# Supplementary material
Source: Springer Nature journal article supplement (https://www.springermedizin.de/resource/supplementary/12916_2012_589_MOESM6_ESM.pdf/9598210)

# Untreated Participants with ADHD

compared with non-ADHD participants

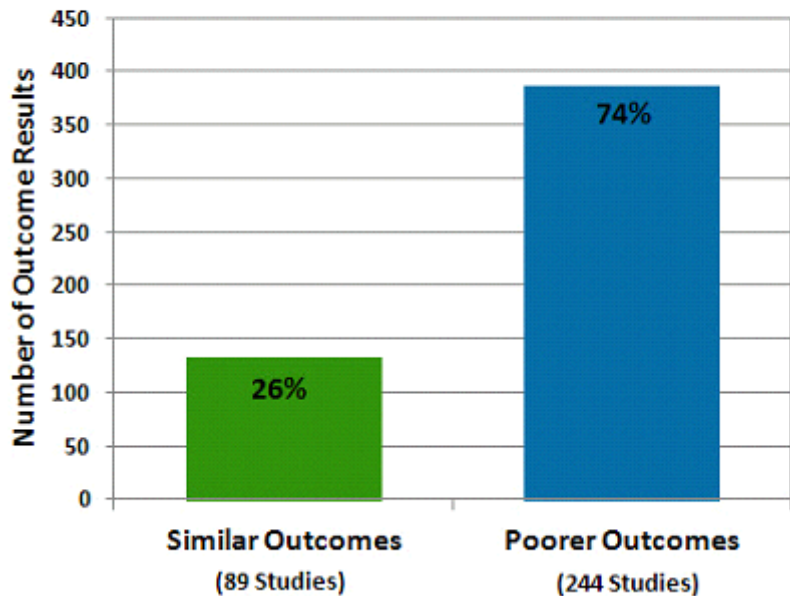

Supplement: MOESM6 [file 9598210]
